# Supplementary material
Source: publisher figshare collection journal article supplement (https://sage.figshare.com/ndownloader/files/11775134)
Supplement: Supplementary file 1 [file 11775134]

## Supplemental Material (SOM-R)

This supplemental material presents additional analyses performed during the course of review that do not appear in the main text of the paper. Although these results are not primary to the paper, the assumption is that some readers may be interested in these analyses just as reviewers were interested. The analyses are organized into sections by the bold typeface.

**Table S1.** Using depression as a control for mental health in childhood did not significantly alter our findings. This table compares Model 2 (see Table 2) with a model additionally controlling for depression in childhood.

|                                | <b>SBP</b> | <b>DBP</b>         | <b>BMI</b> |
|--------------------------------|------------|--------------------|------------|
| Model 2                        | 0.018*     | 0.015 <sup>†</sup> | 0.029*     |
| Model 2 + depression (age 7-9) | 0.019*     | 0.016*             | 0.029*     |

**Table S2.** Controlling for a measure of family involvement (how much time the child spends with his family) or a measure of positivity of the relationship with the primary caregiver did not significantly alter our findings. This table compares Model 2 (see Table 2) with a model additionally controlling for these characteristics of the parent-child relationship.

|                              | <b>SBP</b> | <b>DBP</b>        | <b>BMI</b> |
|------------------------------|------------|-------------------|------------|
| Model 2                      | .018*      | .015 <sup>†</sup> | .029*      |
| Model 2 + Family Involvement | .018*      | .015 <sup>†</sup> | .029*      |
| Model 2 + Parent-child RQ    | .020*      | .018*             | .032*      |

Related to these analyses, we also examined the overlap between these measures using correlations. Peer integration was not concurrently associated with positivity of relationship with the primary caregiver ( $r=.086$ ,  $p=.17$ ) but did show a small significant association with family involvement ( $r=-.12$ ,  $p=.052$ ). The negative association suggests that children who spend more time with their families, spend less time with peers, rather than more.

**Table S3.** Controlling for other potential personality confounds, neuroticism and agreeableness, results look very similar to results controlling for extraversion (which appear in Table 3 and a summary appears below). Indeed, even if neuroticism, agreeableness, and extraversion are entered in the model simultaneously (as shown in the third row below) p-values for the association between early peer integration and our outcomes remain between .014 and .016.

|                                                        | SBP    | DBP    | BMI    |
|--------------------------------------------------------|--------|--------|--------|
| Model 2                                                | 0.018* | 0.015† | 0.029* |
| Model 2 + extraversion                                 | 0.025* | 0.025* | 0.025* |
| Model 2 + neuroticism, agreeableness, and extraversion | 0.024* | 0.026* | 0.025* |

### Growth Models.

Reviewers inquired about change over time in peer social integration and its predictive utility for the outcomes of interest. The authors have experience running growth models and so performed growth models using Mplus. The baseline model revealed that the slope was significantly different from zero (slope = .08,  $p < .001$ ) and also showed significant variance. Thus we continued with predictive models. However, slopes (rate of change) did not predict any of the three outcomes and model fit for these models was marginal at best (e.g., CFI around .85, RMSEA around .10). We also output the slopes estimated in Mplus into SPSS and categorized participants into those who had an upward trajectory and those who had a downward trajectory of peer social integration. In general peer integration was increasing, with approximately 66% of the sample showing positive change and 34% showing negative change. This basic categorization did predict DBP such that being in the increasing group was associated with lower DBP ( $B = -.16$ ,  $p = .014$ ,  $\Delta R^2 = .025$ ). Although associations were in the same direction, no significant effects were seen for SBP or BMI.

### Code for Statistical Analyses.

#### Model 1.

```
REGRESSION
/MISSING LISTWISE
/STATISTICS COEFF OUTS CI(95) R ANOVA ZPP
/CRITERIA=PIN(.05) POUT(.10)
/NOORIGIN
/DEPENDENT lnBMI
/METHOD=ENTER race timewfriendsavg risk famSES1 c1bmi_p.
```

REGRESSION

```
/MISSING LISTWISE  
/STATISTICS COEFF OUTS CI(95) R ANOVA ZPP  
/CRITERIA=PIN(.05) POUT(.10)  
/NOORIGIN  
/DEPENDENT irestsbp  
/METHOD=ENTER race timewfriendsavg risk famSES1 c1bmi_p.
```

```
REGRESSION  
/MISSING LISTWISE  
/STATISTICS COEFF OUTS CI(95) R ANOVA ZPP  
/CRITERIA=PIN(.05) POUT(.10)  
/NOORIGIN  
/DEPENDENT irestdbp  
/METHOD=ENTER race timewfriendsavg risk famSES1 c1bmi_p.
```

#### Model 2.

```
REGRESSION  
/MISSING LISTWISE  
/STATISTICS COEFF OUTS CI(95) R ANOVA ZPP  
/CRITERIA=PIN(.05) POUT(.10)  
/NOORIGIN  
/DEPENDENT lnBMI  
/METHOD=ENTER race timewfriendsavg risk famSES1 c1bmi_p sninum.
```

```
REGRESSION  
/MISSING LISTWISE  
/STATISTICS COEFF OUTS CI(95) R ANOVA ZPP  
/CRITERIA=PIN(.05) POUT(.10)  
/NOORIGIN  
/DEPENDENT irestsbp  
/METHOD=ENTER race timewfriendsavg risk famSES1 c1bmi_p sninum.
```

```
REGRESSION  
/MISSING LISTWISE  
/STATISTICS COEFF OUTS CI(95) R ANOVA ZPP  
/CRITERIA=PIN(.05) POUT(.10)  
/NOORIGIN  
/DEPENDENT irestdbp  
/METHOD=ENTER race timewfriendsavg risk famSES1 c1bmi_p sninum.
```

#### Tables 3 and 4: Controlling for hostility, extroversion, childhood health, antihypertensive medication use.

```
REGRESSION  
/MISSING LISTWISE  
/STATISTICS COEFF OUTS CI(95) R ANOVA ZPP  
/CRITERIA=PIN(.05) POUT(.10)  
/NOORIGIN  
/DEPENDENT lnBMI
```

```
/METHOD=ENTER race timewfriendsavg risk famSES1 c1bmi_p sninum irritable1.
```

REGRESSION

```
/MISSING LISTWISE  
/STATISTICS COEFF OUTS CI(95) R ANOVA ZPP  
/CRITERIA=PIN(.05) POUT(.10)  
/NOORIGIN  
/DEPENDENT irestsbp  
/METHOD=ENTER race timewfriendsavg risk famSES1 c1bmi_p sninum irritable1.
```

REGRESSION

```
/MISSING LISTWISE  
/STATISTICS COEFF OUTS CI(95) R ANOVA ZPP  
/CRITERIA=PIN(.05) POUT(.10)  
/NOORIGIN  
/DEPENDENT irestdbp  
/METHOD=ENTER race timewfriendsavg risk famSES1 c1bmi_p sninum irritable1.
```

REGRESSION

```
/MISSING LISTWISE  
/STATISTICS COEFF OUTS CI(95) R ANOVA ZPP  
/CRITERIA=PIN(.05) POUT(.10)  
/NOORIGIN  
/DEPENDENT lnmbi  
/METHOD=ENTER race timewfriendsavg risk famSES1 c1bmi_p sninum extraversionp.
```

REGRESSION

```
/MISSING LISTWISE  
/STATISTICS COEFF OUTS CI(95) R ANOVA ZPP  
/CRITERIA=PIN(.05) POUT(.10)  
/NOORIGIN  
/DEPENDENT irestsbp  
/METHOD=ENTER race timewfriendsavg risk famSES1 c1bmi_p sninum extraversionp.
```

REGRESSION

```
/MISSING LISTWISE  
/STATISTICS COEFF OUTS CI(95) R ANOVA ZPP  
/CRITERIA=PIN(.05) POUT(.10)  
/NOORIGIN  
/DEPENDENT irestdbp  
/METHOD=ENTER race timewfriendsavg risk famSES1 c1bmi_p sninum extraversionp.
```

REGRESSION

```
/MISSING LISTWISE  
/STATISTICS COEFF OUTS CI(95) R ANOVA ZPP  
/CRITERIA=PIN(.05) POUT(.10)  
/NOORIGIN  
/DEPENDENT lnmbi
```

/METHOD=ENTER race timewfriendsavg risk famSES1 c1bmi\_p sninum healthcond7.

REGRESSION

/MISSING LISTWISE  
/STATISTICS COEFF OUTS CI(95) R ANOVA ZPP  
/CRITERIA=PIN(.05) POUT(.10)  
/NOORIGIN  
/DEPENDENT irestsbp  
/METHOD=ENTER race timewfriendsavg risk famSES1 c1bmi\_p sninum healthcond7.

REGRESSION

/MISSING LISTWISE  
/STATISTICS COEFF OUTS CI(95) R ANOVA ZPP  
/CRITERIA=PIN(.05) POUT(.10)  
/NOORIGIN  
/DEPENDENT irestdbp  
/METHOD=ENTER race timewfriendsavg risk famSES1 c1bmi\_p sninum healthcond7.

REGRESSION

/MISSING LISTWISE  
/STATISTICS COEFF OUTS CI(95) R ANOVA ZPP  
/CRITERIA=PIN(.05) POUT(.10)  
/NOORIGIN  
/DEPENDENT irestsbp  
/METHOD=ENTER race timewfriendsavg risk famSES1 c1bmi\_p sninum hbpmeds.

REGRESSION

/MISSING LISTWISE  
/STATISTICS COEFF OUTS CI(95) R ANOVA ZPP  
/CRITERIA=PIN(.05) POUT(.10)  
/NOORIGIN  
/DEPENDENT irestdbp  
/METHOD=ENTER race timewfriendsavg risk famSES1 c1bmi\_p sninum hbpmeds.

Table 5.

REGRESSION

/MISSING LISTWISE  
/STATISTICS COEFF OUTS CI(95) R ANOVA ZPP  
/CRITERIA=PIN(.05) POUT(.10)  
/NOORIGIN  
/DEPENDENT lnBMI  
/METHOD=ENTER race timewfriendsc1 risk famSES1 c1bmi\_p sninum.

REGRESSION

/MISSING LISTWISE  
/STATISTICS COEFF OUTS CI(95) R ANOVA ZPP  
/CRITERIA=PIN(.05) POUT(.10)

```
/NOORIGIN  
/DEPENDENT irestsbp  
/METHOD=ENTER race timewfriendsc1 risk famSES1 c1bmi_p sninum.
```

```
REGRESSION  
/MISSING LISTWISE  
/STATISTICS COEFF OUTS CI(95) R ANOVA ZPP  
/CRITERIA=PIN(.05) POUT(.10)  
/NOORIGIN  
/DEPENDENT irestdbp  
/METHOD=ENTER race timewfriendsc1 risk famSES1 c1bmi_p sninum.
```

```
REGRESSION  
/MISSING LISTWISE  
/STATISTICS COEFF OUTS CI(95) R ANOVA ZPP  
/CRITERIA=PIN(.05) POUT(.10)  
/NOORIGIN  
/DEPENDENT lnBMI  
/METHOD=ENTER race timewfriendsc2 risk famSES1 c1bmi_p sninum.
```

```
REGRESSION  
/MISSING LISTWISE  
/STATISTICS COEFF OUTS CI(95) R ANOVA ZPP  
/CRITERIA=PIN(.05) POUT(.10)  
/NOORIGIN  
/DEPENDENT irestsbp  
/METHOD=ENTER race timewfriendsc2 risk famSES1 c1bmi_p sninum.
```

```
REGRESSION  
/MISSING LISTWISE  
/STATISTICS COEFF OUTS CI(95) R ANOVA ZPP  
/CRITERIA=PIN(.05) POUT(.10)  
/NOORIGIN  
/DEPENDENT irestdbp  
/METHOD=ENTER race timewfriendsc2 risk famSES1 c1bmi_p sninum.
```

```
REGRESSION  
/MISSING LISTWISE  
/STATISTICS COEFF OUTS CI(95) R ANOVA ZPP  
/CRITERIA=PIN(.05) POUT(.10)  
/NOORIGIN  
/DEPENDENT lnBMI  
/METHOD=ENTER race timewfriendsc3 risk famSES1 c1bmi_p sninum.
```

```
REGRESSION  
/MISSING LISTWISE  
/STATISTICS COEFF OUTS CI(95) R ANOVA ZPP  
/CRITERIA=PIN(.05) POUT(.10)
```

```
/NOORIGIN  
/DEPENDENT irestsbp  
/METHOD=ENTER race timewfriendsc3 risk famSES1 c1bmi_p sninum.
```

```
REGRESSION  
/MISSING LISTWISE  
/STATISTICS COEFF OUTS CI(95) R ANOVA ZPP  
/CRITERIA=PIN(.05) POUT(.10)  
/NOORIGIN  
/DEPENDENT irestdbp  
/METHOD=ENTER race timewfriendsc3 risk famSES1 c1bmi_p sninum.
```
